# Supplementary material for: Imaging multiple sclerosis pathology at 160 μm isotropic resolution by human whole-brain ex vivo magnetic resonance imaging at 3 T
Source: PubMed Central journal article supplement (PMC8322069; doi:10.1038/s41598-021-94891-1), 2021-07-29
Supplement: 41598_2021_94891_MOESM1_ESM.pdf [file 41598_2021_94891_MOESM1_ESM.pdf]

## SUPPLEMENTARY INFORMATION: TABLES

### Imaging Multiple Sclerosis Pathology at 160 $\mu$ m Isotropic Resolution by Human Whole-Brain *Ex Vivo* Magnetic Resonance Imaging at 3T

Weigel, Matthias, PhD <sup>1,2,3,4,\*</sup>; Dechent, Peter, PhD <sup>5</sup>; Galbusera, Riccardo, MD <sup>1,2,3</sup>;  
Bahn, Erik, MD <sup>6</sup>; Nair, Govind, PhD <sup>7</sup>; Lu, Po-Jui, MS <sup>1,2,3</sup>; Kappos, Ludwig, MD <sup>1,2,3</sup>;  
Brück, Wolfgang, MD <sup>6</sup>; Stadelmann, Christine, MD <sup>6</sup>; Granziera, Cristina, MD, PhD <sup>1,2,3</sup>

<sup>1</sup> Translational Imaging in Neurology (ThINK) Basel, Department of Biomedical Engineering, University Hospital Basel and University of Basel, Gewerbestrasse 14, 4123 Allschwil, Switzerland

<sup>2</sup> Neurologic Clinic and Policlinic, Departments of Medicine, Clinical Research and Biomedical Engineering, University Hospital Basel and University of Basel, Petersgraben 4, 4031 Basel, Switzerland

<sup>3</sup> Research Center for Clinical Neuroimmunology and Neuroscience Basel, University Hospital Basel and University of Basel, Petersgraben 4, 4031 Basel, Switzerland

<sup>4</sup> Division of Radiological Physics, Department of Radiology, University Hospital Basel, Petersgraben 4, 4031 Basel, Switzerland

<sup>5</sup> Department of Cognitive Neurology, MR-Research in Neurosciences, University Medical Center Göttingen, Robert-Koch-Strasse 40, 37075 Göttingen, Germany

<sup>6</sup> Institute of Neuropathology, University Medical Center Göttingen, Robert-Koch-Strasse 40, 37075 Göttingen, Germany

<sup>7</sup> Quantitative MRI core facility, National Institute of Neurological Disorders and Stroke, National Institutes of Health, 10 center drive, Bethesda, Maryland, USA

**\*Correspondence: Matthias Weigel (matthias.weigel@unibas.ch)**

## Supplementary Table S1: Overview of Acquisition Times for the Investigated Protocols and Brains

| <b>Isotropic 3D resolution:</b>                      | <b>270 <math>\mu\text{m}</math></b> | <b>240<math>\mu\text{m}</math></b> | <b>200<math>\mu\text{m}</math></b> | <b>180<math>\mu\text{m}</math></b> | <b>160<math>\mu\text{m}</math></b> |
|------------------------------------------------------|-------------------------------------|------------------------------------|------------------------------------|------------------------------------|------------------------------------|
| <b>SNR<sub>relative</sub> / a.u.</b>                 | 1.00                                | 0.78                               | 0.42                               | 0.28                               | 0.19                               |
| <b>TA<sub>base</sub> / h</b>                         | 07:00:31                            | 09:08:07                           | 08:12:33                           | 07:04:49                           | 06:57:20                           |
| <b>avg<sub>min-SNR</sub> #</b>                       | <i>N.N.</i>                         | 3                                  | 4                                  | 5                                  | 6                                  |
| <b>TA<sub>min-SNR</sub> / h</b>                      | 07:00:31                            | 27:24:21                           | 32:50:12                           | 35:24:05                           | 41:44:00                           |
| <b>MS brain #1<br/>avg<sub>max-performed</sub> #</b> | -                                   | 9                                  | 11                                 | 8                                  | 11                                 |
| <b>TA<sub>max-performed</sub> / h</b>                | -                                   | 82:13:03                           | 90:18:03                           | 56:38:32                           | 76:30:40                           |
| <b>MS brain #2<br/>avg<sub>max-performed</sub> #</b> | <i>N.N.</i>                         | -                                  | 8                                  | -                                  | -                                  |
| <b>TA<sub>max-performed</sub> / h</b>                | 07:00:31                            | -                                  | 65:37:44                           | -                                  | -                                  |

SNR<sub>relative</sub>: Relative SNR of the different acquisition protocols.

TA<sub>base</sub>: Acquisition time of the base protocol (single acquisition without averaging).

avg<sub>min-SNR</sub>: Minimum number of averages recommended for “sufficient SNR”, see Supp. Tab. S2 as well as Materials and Methods section.

TA<sub>min-SNR</sub>: Resulting acquisition time for the recommended “minimum SNR protocol”.

avg<sub>max-performed</sub>: Maximum number of averages that could be performed within the frame of the investigations.

TA<sub>max-performed</sub>: Resulting acquisition time for maximum number of averages performed.

“*N.N.*”: not necessary.

# Manual averaging of the acquired magnitude images from repeated base protocol measurements.

Supplementary Table S2: Overview of Expert Decisions for the Visual SNR Evaluation on MS Brain #1

| <b>Recommendations:</b>                  | <b>240<math>\mu</math>m</b> | <b>200<math>\mu</math>m</b> | <b>180<math>\mu</math>m</b> | <b>160<math>\mu</math>m</b> | <b>Expertise</b>           |
|------------------------------------------|-----------------------------|-----------------------------|-----------------------------|-----------------------------|----------------------------|
| <b>averages<sub>min-SNR</sub> (E1) #</b> | 1                           | 3                           | 3                           | 5                           | Neurologist                |
| <b>averages<sub>min-SNR</sub> (E2) #</b> | 6                           | 4                           | 5                           | 6                           | Neuroradiologist           |
| <b>averages<sub>min-SNR</sub> (E3) #</b> | 1                           | 2                           | 2                           | 2                           | Neurologist                |
| <b>averages<sub>min-SNR</sub> (E4) #</b> | 4                           | 5                           | 7                           | 6                           | Image Processing Expert    |
| <b>averages<sub>min-SNR</sub> (E5) #</b> | 3                           | 6                           | 6                           | 9                           | MRI specialist (Biologist) |
| <b>averages<sub>min-SNR</sub> (E6) #</b> | 1                           | 1                           | 3                           | 4                           | Neurologist                |
| <b>averages<sub>min-SNR</sub> (E7) #</b> | 3                           | 5                           | 6                           | 8                           | Physicist                  |
| <b>arithmetic MEAN</b>                   | <b>2.7</b>                  | <b>3.7</b>                  | <b>4.6</b>                  | <b>5.7</b>                  | ---                        |
| <b>MEDIAN</b>                            | <b>3</b>                    | <b>4</b>                    | <b>5</b>                    | <b>6</b>                    | ---                        |

averages<sub>min-SNR</sub>: Minimum number of averages recommended for “sufficient SNR”, here, listed by expert-rater who intentionally have different expertise, i.e., different clinical and scientific backgrounds.

# Manual averaging of the acquired magnitude images from repeated base protocol measurements.
