# Supplementary material for: Imaging multiple sclerosis pathology at 160 μm isotropic resolution by human whole-brain ex vivo magnetic resonance imaging at 3 T
Source: PubMed Central journal article supplement (PMC8322069; doi:10.1038/s41598-021-94891-1), 2021-07-29
Supplement: 41598_2021_94891_MOESM3_ESM.pdf [file 41598_2021_94891_MOESM3_ESM.pdf]

## SUPPLEMENTARY INFORMATION: VIDEOS

### Imaging Multiple Sclerosis Pathology at 160 $\mu$ m Isotropic Resolution by Human Whole-Brain *Ex Vivo* Magnetic Resonance Imaging at 3T

Weigel, Matthias, PhD <sup>1,2,3,4,\*</sup>; Dechent, Peter, PhD <sup>5</sup>; Galbusera, Riccardo, MD <sup>1,2,3</sup>;  
Bahn, Erik, MD <sup>6</sup>; Nair, Govind, PhD <sup>7</sup>; Lu, Po-Jui, MS <sup>1,2,3</sup>; Kappos, Ludwig, MD <sup>1,2,3</sup>;  
Brück, Wolfgang, MD <sup>6</sup>; Stadelmann, Christine, MD <sup>6</sup>; Granziera, Cristina, MD, PhD <sup>1,2,3</sup>

<sup>1</sup> Translational Imaging in Neurology (ThINK) Basel, Department of Biomedical Engineering, University Hospital Basel and University of Basel, Gewerbestrasse 14, 4123 Allschwil, Switzerland

<sup>2</sup> Neurologic Clinic and Policlinic, Departments of Medicine, Clinical Research and Biomedical Engineering, University Hospital Basel and University of Basel, Petersgraben 4, 4031 Basel, Switzerland

<sup>3</sup> Research Center for Clinical Neuroimmunology and Neuroscience Basel, University Hospital Basel and University of Basel, Petersgraben 4, 4031 Basel, Switzerland

<sup>4</sup> Division of Radiological Physics, Department of Radiology, University Hospital Basel, Petersgraben 4, 4031 Basel, Switzerland

<sup>5</sup> Department of Cognitive Neurology, MR-Research in Neurosciences, University Medical Center Göttingen, Robert-Koch-Strasse 40, 37075 Göttingen, Germany

<sup>6</sup> Institute of Neuropathology, University Medical Center Göttingen, Robert-Koch-Strasse 40, 37075 Göttingen, Germany

<sup>7</sup> Quantitative MRI core facility, National Institute of Neurological Disorders and Stroke, National Institutes of Health, 10 center drive, Bethesda, Maryland, USA

**\*Correspondence: Matthias Weigel ([matthias.weigel@unibas.ch](mailto:matthias.weigel@unibas.ch))**

## Materials and Methods

Three videos from the 200 $\mu$ m acquisition of brain #1 were generated, which browse through the entire brain in coronal, sagittal, or transverse direction: After cutting away “empty” image parts in all three directions, the respective 200 $\mu$ m dataset was converted into video streams with 17 frames per second using the software MATLAB RELEASE 2020A (THE MATHWORKS, Natick, MA, USA). The resulting uncompressed *.avi* video files were then encoded each with a H.264 video codec (4000kbps bitrate, software VLC MEDIA PLAYER 3.0.14) to generate compressed *.mp4* video files with reduced file size by a factor of approx. 15.

The videos can also be downloaded from <https://postmortem-mri.matthias-weigel.net>. The file size is between 14MB and 23MB per video.

## Video Legends

**Video S1:** Brain #1, browsing through the 200 $\mu$ m URI-FLASH acquisition slice by slice in coronal slice direction from anterior to posterior.

**Video S2:** Brain #1, browsing through the 200 $\mu$ m URI-FLASH acquisition slice by slice in sagittal slice direction from right to left.

**Video S3:** Brain #1, browsing through the 200 $\mu$ m URI-FLASH acquisition slice by slice in transverse slice direction from inferior to superior.
